# Supplementary material for: Glycerol-based solvents as green reaction media in epoxidations with hydrogen peroxide catalysed by bis[3,5-bis(trifluoromethyl)-diphenyl] diselenide
Source: Royal Society of Chemistry journal article supplement (doi:10.1039/b913052g), 2009-01-01
Supplement: b913052g.pdf [file b913052g.pdf]

Electronic Supplementary Information for

## Glycerol-Based Solvents as Green Reaction Media in Epoxidations with Hydrogen peroxide catalysed by bis[3,5- bis(trifluoromethyl)-diphenyl] diselenide

Héctor García-Marín,<sup>a</sup> John C. van der Toorn,<sup>b</sup> José A. Mayoral,<sup>c</sup> José I. García,<sup>\*a</sup> and Isabel  
W. C. E. Arends<sup>\*b</sup>

<sup>a</sup> *Laboratory for Organic Chemistry and Catalysis Delft University of Technology Julianalaan 136. 2628 BL Delft.  
Netherlands. Fax: +31 15 2784700; Tel: +31 15 2784423; E-mail: I.Arends@tnw.tudelft.nl*

<sup>b</sup> *Dept. Organic Chemistry, Instituto de Ciencia de Materiales de Aragón, Facultad de Ciencias, Univ. de Zaragoza-  
CSIC, Pedro Cerbuna, 12, E-50009 Zaragoza, Spain. Fax: +34 976762077; Tel: +34 976762271; E-mail:  
jig@unizar.es*

<sup>c</sup> *Instituto Universitario de Catálisis Homogénea, Facultad de Ciencias, Univ. de Zaragoza, Pedro Cerbuna, 12, E-  
50009 Zaragoza, Spain. Fax: 976762077; Tel: 976762077; E-mail: mayoral@unizar.es.*

### Content

|                                             |   |
|---------------------------------------------|---|
| 1. List of abbreviations for solvents ..... | 2 |
| 2. Data of epoxidation .....                | 3 |
| 3. Data reduction (PCA) .....               | 4 |
| 4. Variables $y_1$ .....                    | 5 |
| 5. Properties of solvents .....             | 6 |
| 6. References .....                         | 7 |

## 1. Abbreviations for solvents

The abbreviations for all solvents used in this work are:

### *Common solvents:*

|                                 |                     |
|---------------------------------|---------------------|
| trifluoroethanol                | TFE                 |
| dichloromethane                 | DCM                 |
| n-butanol                       | n-BuOH              |
| n-hexanol                       | n-HxOH              |
| ethanol                         | EtOH                |
| 2-propanol                      | 2-PrOH              |
| i-propyl ether                  | i-Pr <sub>2</sub> O |
| diethylene glycol dibutyl ether | DEGDBE              |
| ethylene glycol dimethyl ether  | EGDME               |
| 1,4-dioxane                     | Diox                |

### *Glycerol derivatives:*

|                                                           |       |
|-----------------------------------------------------------|-------|
| 1,3-dimethoxy-2-propanol                                  | 101   |
| 1-methoxy-3-tert-butoxy-2-propanol                        | 104t  |
| 1-n-butoxy-3-tert-butoxy-2-propanol                       | 404t  |
| 1,3-di-n-butoxy-2-propanol                                | 404   |
| 1,3-bis(2,2,2-trifluoroethoxy)-2-propanol                 | 3F03F |
| 1,3-bis(2,2,3,3,3-pentafluoropropoxy)-2-propanol          | 5F05F |
| 1,3-bis(2,2,3,3,4,4,4-heptafluorobutoxy)-2-propanol       | 7F07F |
| 1,2,3-trimethoxypropane                                   | 111   |
| 1,2-dimethoxy-3-isopropoxypropane                         | 113i  |
| 1,2-dimethoxy-3-isobutoxypropane                          | 114i  |
| 1-butoxy-2-methoxy-3-isopropoxypropane                    | 3i14  |
| 1,2-dimethoxy-3-tert-butoxypropane                        | 114t  |
| 1,3-di-n-butoxy-2-methoxypropane                          | 414   |
| 1,2,3-tri-n-butoxypropane                                 | 444   |
| 1-isopropoxy-2-methoxy-3-(2,2,2-trifluoroethoxy)propane   | 3i13F |
| 1-tert-butoxy-2-methoxy-3-(2,2,2-trifluoroethoxy)-propane | 4t13F |
| 1-n-butoxy-2-methoxy-3-(2,2,2-trifluoro-ethoxy)propane    | 413F  |
| 2-methoxy-1,3-bis(2,2,2-trifluoroethoxy)propane           | 3F13F |

## 2. Data of epoxidation

In table S1 are shown variables,  $x_n$ , used to measure the rate of epoxidation of cyclooctene using different solvents.

**Table S1.** Results in catalytic epoxidation of cyclooctene using different solvents.

| <b>Solvent</b>           | <b><math>x_1</math></b> | <b><math>x_2</math></b> | <b><math>x_3</math></b> | <b><math>x_4</math></b> | <b><math>x_5</math></b> | <b><math>x_6</math></b> | <b><math>x_7</math></b> |
|--------------------------|-------------------------|-------------------------|-------------------------|-------------------------|-------------------------|-------------------------|-------------------------|
| <b>TFE</b>               | 491                     | 40                      | 75                      | 94                      | 95                      | 97                      | 97                      |
| <b>5F05F</b>             | 214                     | 17                      | 33                      | 48                      | 79                      | 85                      | 92                      |
| <b>3F03F</b>             | 155                     | 16                      | 29                      | 48                      | 77                      | 84                      | 98                      |
| <b>7F07F</b>             | 172                     | 14                      | 28                      | 46                      | 82                      | 85                      | 91                      |
| <b>DCM</b>               | 153                     | 15                      | 28                      | 48                      | 70                      | 77                      | 87                      |
| <b>3F13F</b>             | 130                     | 13                      | 23                      | 38                      | 57                      | 64                      | 78                      |
| <b>413F</b>              | 75                      | 6                       | 11                      | 19                      | 33                      | 39                      | 56                      |
| <b>n-HxOH</b>            | 67                      | 6                       | 10                      | 18                      | 33                      | 39                      | 57                      |
| <b>3i13F</b>             | 64                      | 5                       | 10                      | 17                      | 31                      | 38                      | 55                      |
| <b>n-BuOH</b>            | 100                     | 1                       | 9                       | 17                      | 32                      | 38                      | 55                      |
| <b>4t13F</b>             | 52                      | 6                       | 10                      | 17                      | 29                      | 35                      | 53                      |
| <b>EtOH</b>              | 51                      | 4                       | 8                       | 14                      | 26                      | 33                      | 49                      |
| <b>404</b>               | 46                      | 4                       | 8                       | 13                      | 25                      | 30                      | 47                      |
| <b>i-PrOH</b>            | 44                      | 3                       | 7                       | 12                      | 24                      | 29                      | 47                      |
| <b>404t</b>              | 38                      | 3                       | 6                       | 9                       | 19                      | 24                      | 40                      |
| <b>114i</b>              | 27                      | 5                       | 7                       | 10                      | 18                      | 23                      | 35                      |
| <b>414</b>               | 31                      | 3                       | 5                       | 10                      | 18                      | 23                      | 36                      |
| <b>444</b>               | 31                      | 4                       | 6                       | 9                       | 17                      | 21                      | 32                      |
| <b>104t</b>              | 47                      | 1                       | 5                       | 9                       | 17                      | 21                      | 34                      |
| <b>3i14</b>              | 36                      | 3                       | 5                       | 8                       | 14                      | 18                      | 29                      |
| <b>i-Pr<sub>2</sub>O</b> | 38                      | 2                       | 5                       | 8                       | 14                      | 18                      | 26                      |
| <b>101</b>               | 15                      | 4                       | 4                       | 7                       | 12                      | 15                      | 26                      |
| <b>114t</b>              | 54                      | 2                       | 4                       | 8                       | 11                      | 14                      | 21                      |
| <b>DEGDBE</b>            | 18                      | 2                       | 3                       | 6                       | 14                      | 18                      | 28                      |
| <b>113i</b>              | 24                      | 2                       | 4                       | 7                       | 11                      | 14                      | 23                      |
| <b>111</b>               | 21                      | 2                       | 4                       | 6                       | 11                      | 14                      | 21                      |
| <b>EGDME</b>             | 13                      | 2                       | 3                       | 4                       | 8                       | 10                      | 17                      |
| <b>Diox</b>              | 9                       | 1                       | 1                       | 2                       | 4                       | 5                       | 7                       |

$x_1$ =TOF<sub>0</sub>,  $x_2$ =Conv(5'),  $x_3$ =Conv(10'),  $x_4$ =Conv(30'),  $x_5$ =Conv(45'),  $x_6$ =Conv(60'),  $x_7$ =Conv(120')

### 3. Data reduction (PCA)

It is shown in figure S1 that a single y variable already contains 93% of the overall variance (indicating the high correlation between the TOF<sub>0</sub> and the conversions at different reaction times), so this transformed variable was subsequently used as a reactivity index for statistical analyses of solvent effects.

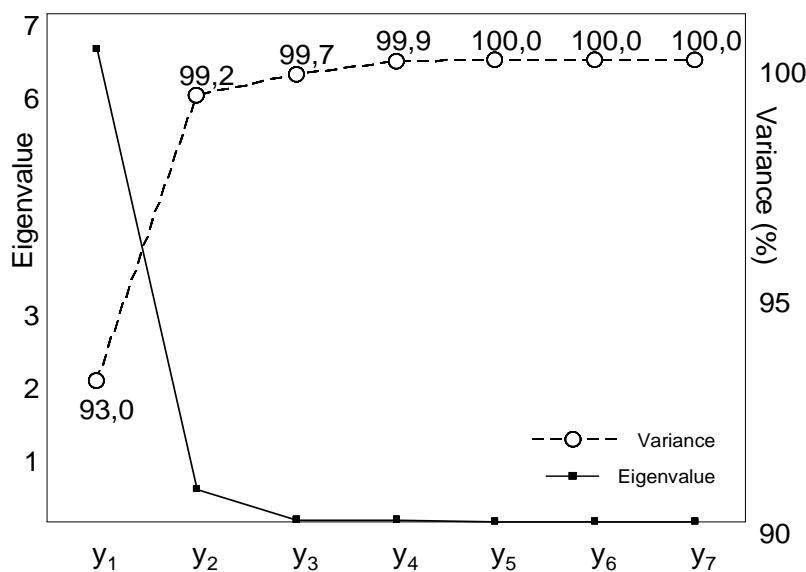

**Figure S1.** Cumulative variance in principal component analysis of TOF<sub>0</sub> and conversion values.

In table S2 are shown variables,  $x_n$ , used to measure the rate of epoxidation of cyclooctene using different solvents.

**Table S2.** Component matrix in principal component analysis.

|                      | Component 1 |
|----------------------|-------------|
| <b>x<sub>1</sub></b> | 0,953       |
| <b>x<sub>2</sub></b> | 0,962       |
| <b>x<sub>3</sub></b> | 0,974       |
| <b>x<sub>4</sub></b> | 0,995       |
| <b>x<sub>5</sub></b> | 0,974       |
| <b>x<sub>6</sub></b> | 0,967       |
| <b>x<sub>7</sub></b> | 0,924       |

These components are used to summarize all variables ( $x_n$ ) in only one variable, which remain more than 93% of variance.

$$y_1 = 0,953 \cdot x_1 + 0,962 \cdot x_2 + 0,974 \cdot x_3 + 0,995 \cdot x_4 + 0,974 \cdot x_5 + 0,967 \cdot x_6 + 0,924 \cdot x_7$$

## 4. Variables $y_1$

Variables  $y_1$  generated by a principal component analysis from data of table S1 are shown in table S3. These variables are normalized

**Table S3.** Results normalized in catalytic epoxidation of cyclooctene using different solvents.

| <b>Solvent</b>           | <b><math>y_1</math></b> |
|--------------------------|-------------------------|
| <b>TFE</b>               | 3,38                    |
| <b>5F05F</b>             | 1,59                    |
| <b>3F03F</b>             | 1,46                    |
| <b>7F07F</b>             | 1,42                    |
| <b>DCM</b>               | 1,29                    |
| <b>3F13F</b>             | 0,90                    |
| <b>413F</b>              | 0,03                    |
| <b>n-HxOH</b>            | 0,01                    |
| <b>3i13F</b>             | -0,05                   |
| <b>n-BuOH</b>            | -0,07                   |
| <b>4t13F</b>             | -0,09                   |
| <b>EtOH</b>              | -0,22                   |
| <b>404</b>               | -0,27                   |
| <b>i-PrOH</b>            | -0,32                   |
| <b>404t</b>              | -0,45                   |
| <b>114i</b>              | -0,46                   |
| <b>414</b>               | -0,50                   |
| <b>444</b>               | -0,52                   |
| <b>104t</b>              | -0,55                   |
| <b>3i14</b>              | -0,60                   |
| <b>i-Pr<sub>2</sub>O</b> | -0,63                   |
| <b>101</b>               | -0,67                   |
| <b>114t</b>              | -0,68                   |
| <b>DEGDBE</b>            | -0,68                   |
| <b>113i</b>              | -0,72                   |
| <b>111</b>               | -0,75                   |
| <b>EGDME</b>             | -0,84                   |
| <b>Diox</b>              | -1,01                   |

## 5. Properties of solvents

Values of parameters used in correlation between the ratio of epoxidation of cyclooctene and properties of solvents used as media are shown on in table S4.

**Table S4.** Values of LogP, ETN,  $\pi^*$ ,  $\beta$  and  $\alpha$  for solvents used

| Solvent             | Subgroup | logP   | ET <sub>N</sub>  | $\pi^*$           | $\beta$             | $\alpha$           |
|---------------------|----------|--------|------------------|-------------------|---------------------|--------------------|
| TFE                 | A        | 0,649  | 0,898            | 0,73              | 0,00                | 1,51               |
| DCM                 | A        | 1,073  | 0,309            | 0,82              | 0,00                | 0,30               |
| n-BuOH              | A        | 0,971  | 0,586            | 0,47              | 0,88                | 0,79               |
| n-HxOH              | A        | 1,883  | 0,559            | 0,40              | 0,45                | 0,33               |
| EtOH                | A        | -0,343 | 0,654            | 0,54              | 0,77                | 0,83               |
| 2-PrOH              | A        | 0,368  | 0,546            | 0,48              | 0,95                | 0,76               |
| i-Pr <sub>2</sub> O | A        | 1,503  | 0,105            | 0,27              | 0,49                | 0,00               |
| DEGDBE              | A        | 2,446  | 0,2 <sup>‡</sup> | 0,5 <sup>‡</sup>  | 0,4 <sup>‡</sup>    | 0,0 <sup>‡</sup>   |
| EGDME               | A        | -0,080 | 0,231            | 0,53              | 0,41                | 0,00               |
| Diox                | A        | -0,262 | 0,164            | 0,55              | 0,37                | 0,00               |
| 101                 | A        | -0,591 | 0,50             | 0,65 <sup>†</sup> | 0,6 <sup>†,‡</sup>  | 0,4 <sup>†</sup>   |
| 104t                | B        | 0,340  | 0,44             | 0,65 <sup>†</sup> | 0,6 <sup>†,‡</sup>  | 0,4 <sup>†</sup>   |
| 404t                | B        | 1,669  | 0,39             | 0,65 <sup>†</sup> | 0,6 <sup>†,‡</sup>  | 0,4 <sup>†</sup>   |
| 404                 | A        | 2,066  | 0,45             | 0,65 <sup>†</sup> | 0,6 <sup>†,‡</sup>  | 0,4 <sup>†</sup>   |
| 3F03F               | A        | 1,424  | 0,701            | 0,55 <sup>†</sup> | 0,7 <sup>†,‡</sup>  | 0,8 <sup>†</sup>   |
| 5F05F               | B        | 2,407  | 0,699            | 0,55 <sup>†</sup> | 0,7 <sup>†,‡</sup>  | 0,8 <sup>†</sup>   |
| 7F07F               | B        | 3,390  | 0,685            | 0,55 <sup>†</sup> | 0,7 <sup>†,‡</sup>  | 0,8 <sup>†</sup>   |
| 111                 | A        | -0,183 | 0,3*             | 0,4 <sup>†</sup>  | 0,4 <sup>†,‡</sup>  | 0,0 <sup>†,‡</sup> |
| 113i                | B        | 0,544  | 0,22             | 0,4 <sup>†</sup>  | 0,4 <sup>†,‡</sup>  | 0,0 <sup>†,‡</sup> |
| 114i                | B        | 1,009  | 0,21             | 0,4 <sup>†</sup>  | 0,4 <sup>†,‡</sup>  | 0,0 <sup>†,‡</sup> |
| 3i14                | B        | 1,872  | 0,155            | 0,4 <sup>†</sup>  | 0,4 <sup>†,‡</sup>  | 0,0 <sup>†,‡</sup> |
| 114t                | B        | 0,749  | 0,214            | 0,4 <sup>†</sup>  | 0,4 <sup>†,‡</sup>  | 0,0 <sup>†,‡</sup> |
| 414                 | B        | 2,475  | 0,145            | 0,4 <sup>†</sup>  | 0,4 <sup>†,‡</sup>  | 0,0 <sup>†,‡</sup> |
| 444                 | A        | 3,804  | 0,11             | 0,4 <sup>†</sup>  | 0,4 <sup>†,‡</sup>  | 0,0 <sup>†,‡</sup> |
| 3i13F               | B        | 1,551  | 0,39             | 0,55 <sup>†</sup> | 0,45 <sup>†,‡</sup> | 0,1 <sup>†,‡</sup> |
| 4t13F               | B        | 1,756  | 0,373            | 0,55 <sup>†</sup> | 0,45 <sup>†,‡</sup> | 0,1 <sup>†,‡</sup> |
| 413F                | B        | 2,154  | 0,385            | 0,55 <sup>†</sup> | 0,45 <sup>†,‡</sup> | 0,1 <sup>†,‡</sup> |
| 3F13F               | A        | 1,832  | 0,553            | 1,0               | 0,5 <sup>‡</sup>    | 0,30               |

<sup>†</sup> Average for a very similar subgroup of solvents. <sup>‡</sup> Estimated.

Values of logP for all solvents have been calculated by addition group theory.<sup>20</sup>

Values of ETN,  $\pi^*$ ,  $\beta$  have been taken from literature for common solvents,<sup>21–25</sup> or they have been determined by experimental measures for glycerol based solvents (preparing to be published).

Values for  $\alpha$  have been determined based on ETN and  $\pi^*$  values.<sup>26</sup>

## 6. References

- <sup>20</sup> Ghose A.K., Viswanadhan V.N., Wendoloski J.J., *J. Phys. Chem.*, **1998**, *102*, 3762-3772
- <sup>21</sup> C. Reichardt *Chem. Rev.*, **1994**, *94* (8), 2319-2358.
- <sup>22</sup> C. Laurence, P. Nicolet, M. T. Dalati, J. L. Abboud, R. Notario, *J. Phys. Chem.*, **1994**, *98* (23), 5807-5816.
- <sup>23</sup> M. J. Kamlet, J. L. Abboud, M. H. Abraham, R. W. Taft, *J. Org. Chem.*, **1983**, *48* (17), 2877-2887.
- <sup>24</sup> M. J. Kamlet, R. W. Taft, *J. Am. Chem. Soc.*, **1976**, *98* (2), 377-383.
- <sup>25</sup> R. W. Taft, M. J. Kamlet *J. Am. Chem. Soc.*, **1976**, *98* (10), 2886-2894.
- <sup>26</sup> Y. Marcus, *Chem. Soc. Rev.*, **1993**, *22*, 409.
